# Supplementary material for: Performance and characterization of a non-sintered zeolite porous filter for the simultaneous removal of nitrogen and phosphorus in a biological aerated filter (BAF)
Source: Royal Society of Chemistry journal article supplement (doi:10.1039/c6ra05417j), 2016-01-01
Supplement: c6ra05417j1.pdf [file c6ra05417j1.pdf]

## Supplementary material

### Performance and characterization of non-sintered -zeolite porous filter for the simultaneous removal of nitrogen and phosphorus in a biological aerated filter (BAF)

Teng Bao<sup>a,b</sup>, Tianhu Chen<sup>a\*</sup>, Marie-Luise Wille<sup>c</sup>, Dong Chen<sup>a</sup>, Wentao Wu<sup>a</sup>, Ray L.  
Frost<sup>b\*\*</sup>

<sup>a</sup>Laboratory for Nanominerals and Environmental Material, School of Resource and Environmental Engineering, Hefei University of Technology, China.

<sup>b</sup>School of Chemistry, Physics and Mechanical Engineering, Science and Engineering Faculty, Queensland University of Technology, Australia.

<sup>c</sup>Institute of Health & Biomedical Innovation, Queensland University of Technology, Brisbane, Australia.

---

\*Author to whom correspondence should be addressed: TianhuChen,chentianhu@hfut.edu.cn.; Ray L. Frost, r.frost@qut.edu.au

## **List of Figures**

**Figure S1. Photographs of ZPF and CAC samples.**

**Figure S2. Schematic of the experimental set-up.**

**Figure S1. Photographs of ZPF and CAC samples.**

**A, CAC; B, ZPF**

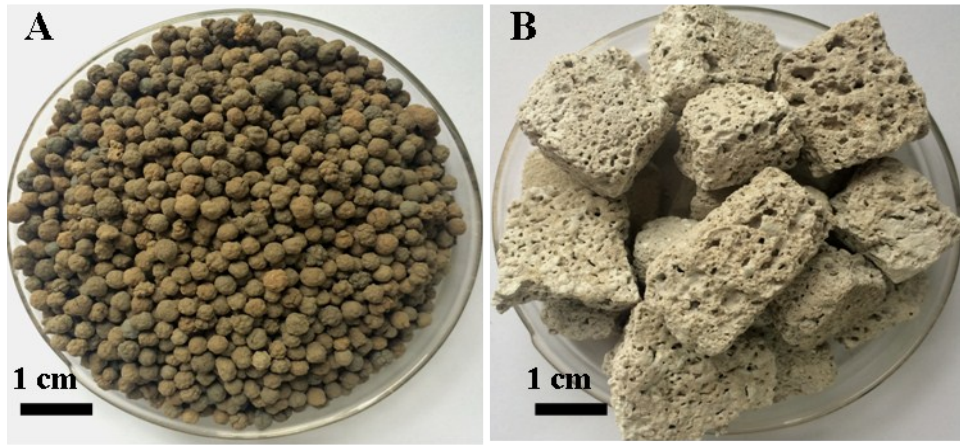

Figure S2. Schematic diagram of experimental set-up.

A- ZPF BAF; B- CAC BAF; C- Wastewater tank; D- Air blower;

E- Water pump; F-Effluent pipe;

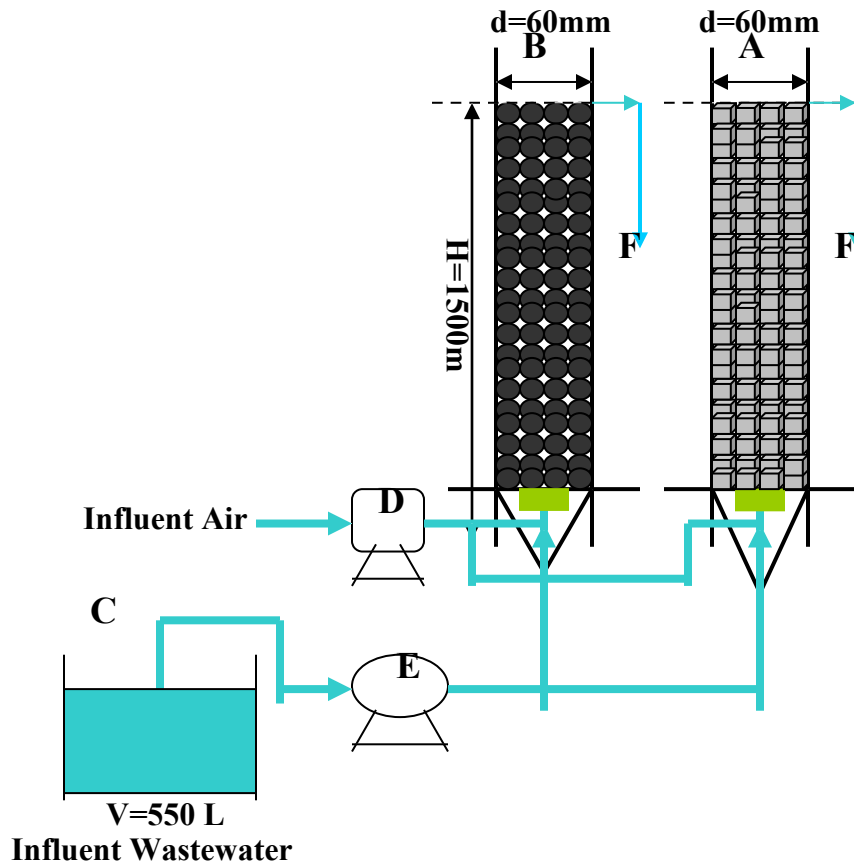

## **List of Tables.**

**Table. S1. The composition of raw materials (%)**

**Table. S1. The composition of raw materials (%)**

| <b>Chemical composition of raw materials (wt %)</b> |                |                                    |              |                                    |               |
|-----------------------------------------------------|----------------|------------------------------------|--------------|------------------------------------|---------------|
|                                                     | <b>Zeolite</b> |                                    | <b>CAC</b>   |                                    | <b>Cement</b> |
| <b>SiO<sub>2</sub></b>                              | <b>76.02</b>   | <b>SiO<sub>2</sub></b>             | <b>60.24</b> | <b>SiO<sub>2</sub></b>             | <b>26.63</b>  |
| <b>Al<sub>2</sub>O<sub>3</sub></b>                  | <b>11.27</b>   | <b>Al<sub>2</sub>O<sub>3</sub></b> | <b>17.94</b> | <b>Al<sub>2</sub>O<sub>3</sub></b> | <b>6.12</b>   |
| <b>Fe<sub>2</sub>O<sub>3</sub></b>                  | <b>1.05</b>    | <b>Fe<sub>2</sub>O<sub>3</sub></b> | <b>13.16</b> | <b>Fe<sub>2</sub>O<sub>3</sub></b> | <b>1.76</b>   |
| <b>K<sub>2</sub>O</b>                               | <b>2.50</b>    | <b>K<sub>2</sub>O</b>              | <b>2.46</b>  | <b>Mn<sub>2</sub>O<sub>3</sub></b> | <b>0.41</b>   |
| <b>CaO</b>                                          | <b>2.54</b>    | <b>CaO</b>                         | <b>0.41</b>  | <b>TiO<sub>2</sub></b>             | <b>0.13</b>   |
| <b>MgO</b>                                          | <b>0.98</b>    | <b>MgO</b>                         | <b>1.62</b>  | <b>CaO</b>                         | <b>60.32</b>  |
| <b>Na<sub>2</sub>O</b>                              | <b>0.35</b>    | <b>TiO<sub>2</sub></b>             | <b>1.79</b>  | <b>MgO</b>                         | <b>1.43</b>   |
| -----                                               | -----          | <b>Na<sub>2</sub>O</b>             | <b>0.97</b>  | <b>P<sub>2</sub>O<sub>5</sub></b>  | <b>0.21</b>   |
| -----                                               | -----          | <b>MnO</b>                         | <b>0.33</b>  | <b>SO<sub>3</sub></b>              | <b>1.97</b>   |
| -----                                               | -----          | <b>CuO</b>                         | <b>0.40</b>  | <b>K<sub>2</sub>O</b>              | <b>0.72</b>   |
| -----                                               | -----          | <b>P<sub>2</sub>O<sub>5</sub></b>  | <b>0.18</b>  | <b>Na<sub>2</sub>O</b>             | <b>0.16</b>   |
| -----                                               | -----          | <b>ZrO<sub>2</sub></b>             | <b>0.13</b>  | -----                              | -----         |
| -----                                               | -----          | <b>Cr<sub>2</sub>O<sub>3</sub></b> | <b>0.06</b>  | -----                              | -----         |

**CAC – Commercially available ceramsite;**
